# Supplementary material
Source: PubMed Central journal article supplement (PMC9008872)
Supplement: NIHMS1790657-supplement-Digital_Content_1.pdf [file NIHMS1790657-supplement-Digital_Content_1.pdf]

## Supplemental Digital Content 1

*Logistic Regression Model for Potentially Preventable Reasons for Leaving*

| <b>Variables</b> | <b>Estimate</b> | <b>Std. Error</b> | <b>Odds Ratio</b> | <b>95% CI</b> | <b>P-value</b> |
|------------------|-----------------|-------------------|-------------------|---------------|----------------|
| (Intercept)      | 3.861           | 1.082             | 47.511            | 6.28, 446.69  | 0.0004         |
| NPHA             | -0.751          | 0.455             | 0.472             | 0.19, 1.13    | 0.0986         |
| NFQC             | -0.521          | 0.542             | 0.594             | 0.20, 1.71    | 0.3367         |
| NMLS             | -0.567          | 0.268             | 0.567             | 0.33, 0.95    | *0.0344        |
| SRA              | 0.263           | 0.278             | 1.301             | 0.76, 2.27    | 0.3440         |
| CNPR             | 0.105           | 0.330             | 1.110             | 0.58, 2.13    | 0.7516         |

Pseudo R<sup>2</sup> (predictive ability of the model): 0.43 Significance codes: \*p < 0.05

NPHA=Nurse Participation in Hospital Affairs; NFQC=Nursing Foundations of Quality Care; NMLS=Nurse Manager Ability, Leadership, and Support of Nurses; SRA=Staffing and Resource Adequacy; CNPR=Collegial Nurse-Physician Relationships
