# Supplementary material
Source: PubMed Central journal article supplement (PMC9008872)
Supplement: NIHMS1790657-supplement-Digital_Content_2.pdf [file NIHMS1790657-supplement-Digital_Content_2.pdf]

## Supplemental Digital Content 2

### Decision Tree Model

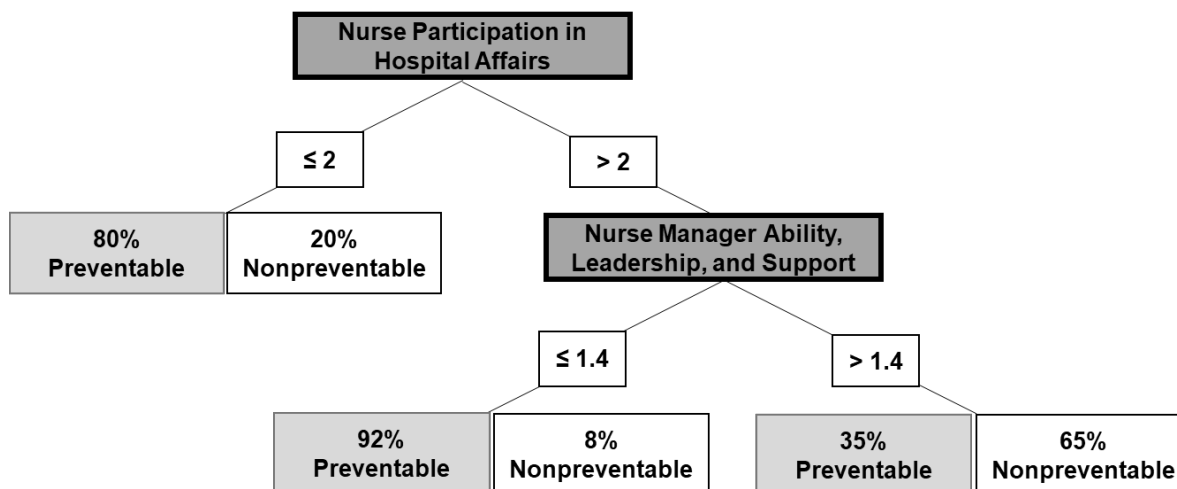

This figure depicts the conditional decision tree analysis results. A decision tree partitions the predictor variables into mutually exclusive groups (1). The model showed that the data was split based on the Nurse Participation in Hospital Affairs subscale score ( $\leq 2$  and  $> 2$ ). The left side of the branch contains respondents ( $n=43$ ) that had a Nurse Participation in Hospital Affairs subscale score of  $\leq 2$ . Eighty percentage of respondents who had a Nurse Participation in Hospital Affairs subscale score of  $\leq 2$  indicated they were leaving for preventable reasons. The right side of the branch contains respondents who had a Nurse Participation in Hospital Affairs subscale score of  $> 2$ . This branch was further split based on Nurse Manager Leadership Support of Nurses subscale score of  $\leq 1.4$  and  $> 1.4$ . Ninety-two percentage of respondents ( $n=12$ ) who had a Nurse Participation in Hospital Affairs subscale score of  $> 2$  and a Nurse Manager Leadership Support subscale score of  $\leq 1.4$  indicated they were leaving for preventable reasons. Thirty-five percent of respondents ( $n=124$ ) who had a Nurse Participation in Hospital Affairs subscale score of  $> 2$  and a Nurse Manager Leadership Support subscale score of  $> 1.4$  indicated they were leaving for preventable reasons.

### References

1. Breiman L, Friedman JH, Olshen RA, Stone CJ. Classification and regression trees. Belmont, CA: Wadsworth. International Group. 1984;432:151–166.
