# Supplementary material
Source: PubMed Central journal article supplement (PMC9008872)
Supplement: NIHMS1790657-supplement-DIgital_Content_3.pdf [file NIHMS1790657-supplement-DIgital_Content_3.pdf]

### Supplemental Digital Content 3

#### *Random Forest Model*

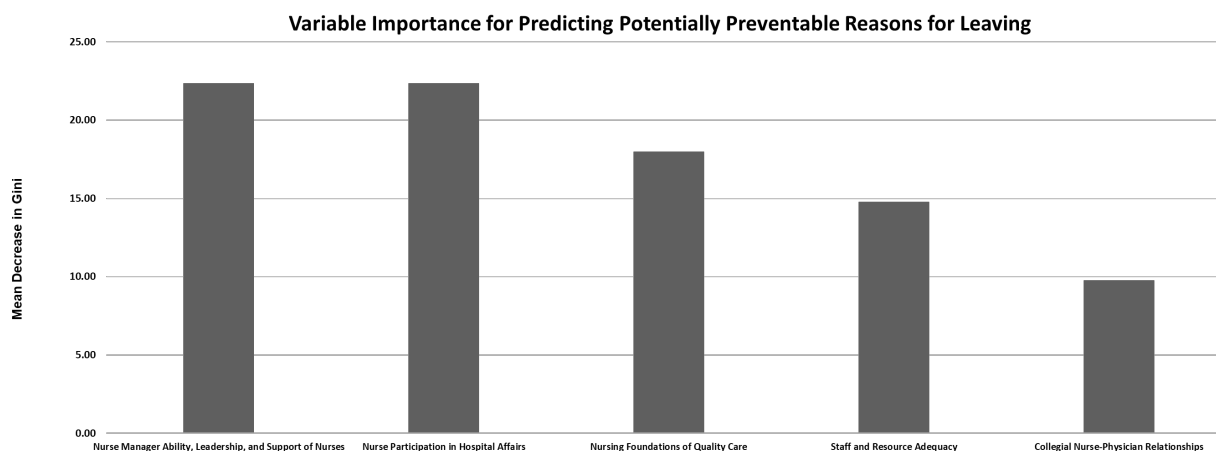

Note: Random forest averages the predictor values from tree models and calculates the importance rank of predictors. The random forest analysis outputs the predictor variables in order of importance for predicting potentially preventable reasons using the mean decrease in gini. Gini is how much the model fit changes or accuracy decreases when you drop or delete a variable from the model (1). The higher the mean decrease in gini, the more important the variable.

#### Reference

1. Breiman L. Random Forests. Springer Science and Business Media LLC. 2001.
